# Supplementary material
Source: PubMed Central journal article supplement (PMC5632585)
Supplement: NIHMS876405-supplement-revised_supplement.pdf [file NIHMS876405-supplement-revised_supplement.pdf]

## Supplement

### Materials and Methods

**Human subjects.** Informed consents were obtained from all subjects (or their guardian) for these studies in accordance with Helsinki principles for enrollment in research protocols that were approved by the Institutional Review Boards of NIAID, Yale, or Baylor. Blood from anonymous healthy donors was obtained from the NIH Clinical Center or purchased from the New York Blood Center under approved protocols.

**Whole-exome and Sanger sequencing.** Genomic DNA was extracted from peripheral blood cells and used for SureSelect Human All Exon 50 Mb kit (Agilent) selection followed by next-generation sequencing on an Illumina HiSeq Sequencing System with 50-100x coverage. The DNA reads were mapped to the hg19 human genome reference using Burrows-Wheeler Aligner, and variant calling was performed using the Genome Analysis Toolkit (the Broad Institute) and SeattleSeq Annotation tool. After filtering and prioritizing variants, heterozygous *PIK3CD* variants were investigated further since the clinical characteristics of the patients were consistent with APDS. For confirmation of mutations, *PIK3CD* genomic DNA was PCR amplified and subjected to Sanger sequencing after PCR purification. Whole-exome data will be deposited in dbGap.

**Cell culture and transfection.** Human T cells were isolated from patient or healthy donor peripheral blood by EasySep Direct Human T Cell Isolation Kit (STEMCELL Technologies) and resuspended at a density of  $1 \times 10^6$  cells per ml in complete RPMI-1640 medium (Lonza) containing 10% fetal bovine serum (FBS), 2 mM glutamine, and penicillin and streptomycin (100 U/ml each; Invitrogen). Transfection was performed with Amaxa Nucleofection kits (Lonza) for primary cells and with standard electroporation for human cells and evaluated 24 hours post-transfection. Inhibitor studies were performed by pre-treating activated T cell blasts with 100-200 nM idelalisib (also called CAL101 or GS1101; purchased from Cayman Chemicals) for 30-60 min before fixing cells and performing flow cytometry for the indicated phosphosites.

**Flow cytometry.** For standard surface staining, PBMCs ( $1 \times 10^6$  cells per sample), sorted cells, expanded T cell populations or cell lines were washed with PBS and incubated for 30 min at 4 °C (in the dark) in 100  $\mu$ l 5% FBS in PBS with the appropriate fluorochrome-labeled monoclonal antibodies or their isotype-matched control antibodies. After two washes with PBS,  $1 \times 10^4$  to  $5 \times 10^4$  live cells were analyzed by flow cytometry. For Phosflow staining, unless otherwise indicated, cells were kept in complete RPMI-1640 medium while alive, then were fixed directly in complete RPMI-1640 medium with BD Lyse-Fix and then permeabilized with Perm Buffer III according to manufacturer's instructions (BD). The following validated antibodies were used for flow cytometry: anti-CD20 (2H7; BioLegend); anti-CD27 (M-T271), anti-CD10 (HI10A), anti-CD8 (RPA-T8); all from BD Biosciences); anti-CD3 (HIT3 $\alpha$  (BioLegend) or UCHT1 (BD Biosciences), anti-CD4 (RPA-T4; BD Biosciences or BioLegend); anti-CCR7 (150503 (R&D Systems) or G043H7 (BioLegend)); anti-CD45RA (H100; eBioscience or BioLegend); and anti-CD57 (TB01; eBioscience). For Phosflow analyses, the following antibodies were used: Alexa Fluor 647-conjugated antibody to AKT

phosphorylated at Ser473 (D9E; Cell Signaling), Alexa Fluor 488–conjugated antibody to AKT phosphorylated at Thr308 (C31E5E; Cell Signaling), phycoerythrin-conjugated antibody to S6 phosphorylated at Ser235 and Ser236 (N7-548; BD Biosciences) and Alexa Fluor 647–conjugated antibody to S6 phosphorylated at Ser240 and Ser244 (D68F8; Cell Signaling). At least three independent experiments were performed.

**Cell lysis and immunoblot analysis.** Cells were washed in PBS or RPMI medium with no FBS and were immediately lysed in 1% Triton X-100, 50 mM Tris-HCl pH 8, 150 mM NaCl, 2 mM EDTA, 10% glycerol, complete protease inhibitor 'cocktail' (Roche) and phosphatase inhibitor 'cocktails' (Sigma). Lysates were then clarified by centrifugation at 15,000g at 4 °C for 10 min and measured for protein content by BCA assay (Pierce). Approximately 20 µg total protein was separated by SDS-PAGE and transferred to a nitrocellulose membrane (Bio-Rad). Nonspecific binding in membranes was blocked for 1 h at 21 °C with 5% nonfat dry milk in Tris-buffered saline (TBS), pH 8.5, with 0.01% Tween-20 (TBST), followed by incubation overnight at 4 °C with primary antibody. After membranes were washed for 1 h at 21 °C with TBST, horseradish peroxidase–conjugated secondary antibody was added for an additional hour at 21 °C. The following validated antibodies were used: anti-p110 $\delta$  (04-401; Millipore or D1Q7R; Cell Signaling), anti-Myc tag (9B11; Cell Signaling), antibody to AKT phosphorylated at Ser473 (4060; Cell Signaling), anti-AKT (4691; Cell Signaling), goat anti–rabbit IgG (4050; Southern Biotech), goat anti-mouse IgG1 (1070; Southern Biotech) and goat anti–mouse IgG (1030; Southern Biotech). After a final wash step for 1 h, horseradish peroxidase substrate (Clarity; Bio-Rad) was added to the membranes, which were then subjected to chemiluminescence imaging. Band intensities were quantified with Image Lab software (Bio-Rad). The loading control is from stain-free imaging of total protein on the membrane after transfer, focusing on a doublet around 30-35 kDa in size (Bio-Rad).

**Protein structure modeling.** A model of the structure of p110 $\delta$  in complex with p85 $\alpha$  was generated based on the structure of the p110 $\delta$ /p85 $\alpha$  inter-SH2 complex (PDB:5DXU) (1). Mutations at G124D and E81K were generated in COOT (2), with the most probable rotamer without clashes selected. For G124D no rotamers had an absence of clashes, so the most probable was selected.

**Protein expression and purification.** The WT PI3K and G124D variant protein complexes were expressed and purified in the same manner, similar to previously described methods (3). Protein complexes were expressed in *Spodoptera frugiperda* (Sf9) cells by co-infecting at  $1-2 \times 10^6$  cells/mL with an optimized ratio of p110 $\delta$ :p85 $\alpha$  baculovirus. After 40-72 hours, co-infections were harvested by centrifugation before washing with ice-cold PBS and snap-freezing in liquid nitrogen. Protein purifications proceeded at 4°C, and were initiated by re-suspension in lysis buffer (20 mM Tris pH 8.0, 100 mM NaCl, 10 mM imidazole pH 8.0, 5% glycerol (v/v), 2 mM bME, protease inhibitor (Protease Inhibitor Cocktail Set III, Sigma)) before a short sonication protocol (1 min, 15s on, 15s off, level 4.0, Misonix sonicator 3000). Triton X-100 was added (final concentration of 0.1%) prior to lysate being cleared by centrifugation (20,000 g for 45 minutes, Beckman Coulter Avanti J-25I, JA 25.50 rotor), Protein was then purified by nickel affinity by loading the supernatant onto a 5 mL HisTrap™ FF column (GE Healthcare) equilibrated in NiNTA A buffer (20 mM Tris pH 8.0, 100 mM NaCl, 10 mM imidazole pH 8.0, 5% (v/v) glycerol, 2 mM bME ) before being washed with 20 mL of NiNTA A

buffer and 6% NiNTA B buffer (20 mM Tris pH 8.0, 100 mM NaCl, 200 mM imidazole pH 8.0, 5% (v/v) glycerol, 2 mM bME). The protein was eluted with 100% NiNTA B buffer, and the eluted protein was further purified by anion exchange. The elution was loaded onto a 5 mL HiTrap™ Q HP column (GE Healthcare) equilibrated in Hep A buffer (20 mM Tris pH 8.0, 100 mM NaCl, 5% (v/v) glycerol, 2 mM bME) and eluted by use of a Hep A buffer and Hep B buffer gradient (20 mM Tris pH 8.0, 1 M NaCl, 5% (v/v) glycerol, 2 mM bME). Fractions containing protein were pooled and concentrated using a 50,000 MWCO Amicon concentrator (Millipore) before purification by size-exclusion chromatography. A Superdex™ 200 10/300 GL Increase size-exclusion column (GE Healthcare) equilibrated in Gel Filtration Buffer (20 mM HEPES pH 7.5, 150 mM NaCl, 0.5 mM tris(2-carboxyethyl)phosphine (TCEP)) was injected with concentrated protein and the eluted protein was concentrated before snap-freezing in liquid nitrogen at 0.5-1.0 mg/mL. Concentrations were determined by measuring absorbance at 280 nm using a NanoDrop (Thermo Scientific).

***In vitro* kinase assays.** Lipid kinase assays monitoring hydrolysis of ATP were carried out using the Transcreener ADP2 FI assay (BellBrook Labs), according to previously published protocols (4). Assays were carried out using lipid vesicles composed of 5% Brain PIP<sub>2</sub>, 95% Brain PS (w/v) at a final concentration of 0.45 mg/ml and 100 μM ATP. Experiments with phosphopeptide (mouse PDGFR residues 735–767, with pY740 and pY751) were carried out at a final concentration of 1 μM. *In vitro* lipid kinase activity of PI3K complexes was measured by monitoring ATP hydrolysis using the Transcreener ADP2 Fluorescence Intensity (FI) assay (BellBrook Labs). Proteins were diluted in 2X PI3K kinase buffer (100 mM HEPES pH 7.5, 200 mM NaCl, 6 mM MgCl<sub>2</sub>, 2 mM EDTA, 0.06% CHAPS, 2 mM TCEP) and reactions were started by the addition of 2X substrate solution (0.9 mg/mL lipid vesicles (5% C8 phosphatidylinositol 4,5 bisphosphate, 95% phosphatidylserine), 200 μM ATP) in a 384-well black microplate (Corning). Reactions were carried out at 23°C for 60 minutes and stopped by addition of 2X Stop and Detect buffer (1X Stop and Detect Buffer, 8 nM ADP Alexa594 Tracer, 93.7 μg/mL ADP2 Antibody-IRDye QC-1). The antibody, tracer and ADP were allowed to equilibrate for 60 minutes before the fluorescence intensity was measured using a Spectramax M5 plate reader (λ<sub>excitation</sub> = 590 nm and λ<sub>emission</sub> = 620 nm; 20 nm bandwidth; Molecular Devices). Calculation of specific activity was performed using an ATP/ADP standard curve according to the Transcreener ADP FI manual and the fold activation was calculated by normalizing all specific activity values to the wild-type PI3K specific activity value. Experiments were performed in triplicate (error shown as SD, n=3).

**Hydrogen-deuterium exchange mass spectrometry (HDX-MS).** HDX-MS experiments were carried out similar to previously published protocols (5, 6). In brief, initiation of deuterium exchange was carried out by the addition of 45 μL of deuterated buffer (10 mM HEPES pH 7.5, 100 mM NaCl, 98% (v/v) D<sub>2</sub>O) and incubated for three different time points (3 s, 30 s, and 300 s at 23°C). The reaction consisted of 50 μL final volume with a PI3K concentration of 120 nM, before being terminated by the addition of 20 μL ice-cold quench buffer (2 M guanidine-HCl, 3% formic acid). Samples were immediately frozen in liquid nitrogen and stored at -80°C.

Protein samples were rapidly thawed and injected onto an online UPLC system for digestion and separation. The protein was run over two immobilized pepsin columns (Applied Biosystems; porosyme, 2-3131-00) at 10°C and 2°C at 200  $\mu$ L/min for 3 minutes, and peptides were collected onto a VanGuard precolumn trap (Waters). The trap was subsequently eluted in line with an Acquity 1.7  $\mu$ m particle, 100  $\times$  1 mm<sup>2</sup> C18 UPLC column (Waters), using a gradient of 5–36% B (buffer A 0.1% formic acid, buffer B 100% acetonitrile) over 16 minutes. Mass spectrometry experiments were performed on an Impact II TOF (Bruker) acquiring over a mass range from 150 to 2200 m/z using an electrospray ionization source operated at a temperature of 200°C and a spray voltage of 4.5 kV. Peptides were identified using data-dependent acquisition methods following tandem MS/MS experiments (0.5 s precursor scan from 150–2000 m/z; twelve 0.25 s fragment scans from 150–2000 m/z). MS/MS datasets were analyzed using PEAKS7 (PEAKS), and a false discovery rate was set at 1% using a database of purified proteins and known contaminants.

HD-Examiner software (Sierra Analytics) was used to automatically calculate the level of deuterium incorporation into each peptide. All peptides were manually inspected for correct charge state and presence of overlapping peptides. Deuteration levels were calculated using the centroid of the experimental isotope clusters. Results for these proteins are presented as relative levels of deuterium incorporation, and the only control for back exchange was the level of deuterium present in the buffer (78%-PI3K). The real level of deuteration is assumed to be ~25–35% higher than shown, based on tests performed with fully deuterated standard peptides. The average error of all time points and conditions for each HDX project was less than 0.2 Da. Therefore, changes in any peptide at any time point greater than both 7% and 0.7 Da between conditions with a paired t-test value of  $p < 0.05$  were considered significant. The full deuterium incorporation for all peptides is shown in Fig. E3 and E4.

### Statistical analyses

Statistical analysis for differences in lipid kinase activity were carried out using a paired student t-test. For HDX-MS, changes in any peptide at any time point greater than both 7% and 0.7 Da between conditions with a paired t-test value of  $p < 0.05$  were considered significant. For immunoblot quantification of phospho-AKT (Fig. E5b), indicated p values were from Welch's t test.

### Primer sequences

*Generation of wild-type PIK3CD expression vector with C-terminal 5xMyc tag.*  
pcDNA3.1 backbone

Forward: CAGTGTGCTGGAATTCGCCACCATGCCCCCTGGGGTGGACTG

Reverse: TTTTGCTCTGCGGCCGCCTGCCTGTTGTCTTTGGACA

*Generation of patient PIK3CD variants by site-directed mutagenesis.*

E81K:

Forward: CAGACAGCGGAGCAGCAAAAGCTGGAGGACGAGCAAC

Reverse: GTTGCTCGTCCTCCAGCTTTTGCTGCTCCGCTGTCTG

G124D:

Forward: GCCTCCTCATCGGCAAAGACCTCCACGAGTTTGACTCC

Reverse: GGAGTCAAACCTCGTGGAGGTCTTTGCCGATGAGGAGGC

## Figure legends

**Figure E1. The phenotype of patient lymphocytes.** Flow cytometry on PBMCs from a female healthy control subject and patient A.I.1, identifying naive T cells (CD45RA<sup>+</sup>CCR7<sup>+</sup>), central memory T cells (CD45RA<sup>-</sup>CCR7<sup>+</sup>), T<sub>EM</sub> cells (CD45RA<sup>-</sup>CCR7<sup>-</sup>) and T<sub>EMRA</sub> cells (CD45RA<sup>+</sup>CCR7<sup>-</sup>). Surface expression on CD4<sup>+</sup> and CD8<sup>+</sup> lymphocytes of CD27 and CD57 (right) identifying terminally differentiated senescent effector T cells.

**Figure E2. Domains and structural analysis of E81 and G124D of p110δ.** (a) Schematic of p110δ with previous (black) and novel (red) mutations. (b) E81 and G124 residues (yellow spheres) in the structure of p110δ (PDB 5DXU) with the inter-SH2 domain of p85α (light green). (c) Zoomed-in view of mutant residues with a putative steric clash between G124D and T76 in red.

**Figure E3. Summary of all HDX p110δ peptide data.** The charge state (Z), residue start (S), residue end number (E), and retention time (RT) are displayed for every peptide. Three timepoints are labelled, and the relative level of HDX is colored on a blue-to-red continuum. Data listed are the average of three independent experiments, with SD given. ## indicates no coverage for the specific peptide.

**Figure E4. Summary of all HDX p85α peptide data.** The charge state (Z), residue start (S), residue end number (E), and retention time (RT) are displayed for every peptide. Three timepoints are labelled, and the relative level of HDX is colored on a blue-to-red continuum. Data listed are the average of three independent experiments, with SD given. ## indicates no coverage for the specific peptide.

**Figure E5. E81K or G124D hyperactivate p110δ despite normal p85 binding.** (a) PI3K/AKT/mTOR signaling, adapted from (22). (b) Quantification of phospho-AKT immunoblot data from 5 experiments as in Figure 1e. (c) Phospho-S6 S235/236 or S240/244 in indicated T cell blasts. (d-e) Cumulative data on phospho-AKT S473 and phospho-S6 S240/244 in indicated T cell blasts. (f) p85 immunoprecipitates (IP) or input from healthy T cells overexpressing the indicated protein and probed as indicated.

## Supplement References

1. Heffron TP, *et al.* (2016) The Rational Design of Selective Benzoxazepin Inhibitors of the alpha-Isoform of Phosphoinositide 3-Kinase Culminating in the Identification of (S)-2-((2-(1-Isopropyl-1H-1,2,4-triazol-5-yl)-5,6-dihydrobenzo[f]imidazo[1,2-d][1,4]oxazepin-9-yl)oxy)propanamide (GDC-0326). *J Med Chem* 59(3):985-1002.
2. Emsley P, Lohkamp B, Scott WG, & Cowtan K (2010) Features and development of Coot. *Acta Crystallogr D Biol Crystallogr* 66(Pt 4):486-501.
3. Burke JE, *et al.* (2011) Dynamics of the phosphoinositide 3-kinase p110delta interaction with p85alpha and membranes reveals aspects of regulation distinct from p110alpha. *Structure* 19(8):1127-1137.
4. Zhang X, *et al.* (2011) Structure of lipid kinase p110beta/p85beta elucidates an unusual SH2-domain-mediated inhibitory mechanism. *Mol Cell* 41(5):567-578.
5. Vadas O, Jenkins, M.L., Dornan, G.L., Burke, J.E. (2016) Chapter Seven - Using Hydrogen-Deuterium Exchange Mass Spectrometry to Examine Protein-Membrane Interactions. *Methods in Enzymology*, Vol 583, pp 143-172.
6. Dornan GL, *et al.* (2017) Conformational disruption of PI3K $\delta$  regulation by immunodeficiency mutations in PIK3CD and PIK3R1. *Proceedings of the National Academy of Sciences* 114(8):1982-1987.
7. Samuels Y, *et al.* (2004) Frequency of Mutations of the PIK3CA Gene in Human Cancers. *Science* 304(5670):554-554.
8. Echeverria I, Liu Y, Gabelli SB, & Amzel LM (2015) Oncogenic mutations weaken the interactions that stabilize the p110 $\alpha$ -p85 $\alpha$  heterodimer in phosphatidylinositol 3-kinase  $\alpha$ . *FEBS Journal* 282(18):3528-3542.
9. Oda K, *et al.* (2008) PIK3CA cooperates with other phosphatidylinositol 3'-kinase pathway mutations to effect oncogenic transformation. *Cancer Res* 68(19):8127-8136.
10. Gymnopoulos M, Elsliger MA, & Vogt PK (2007) Rare cancer-specific mutations in PIK3CA show gain of function. *Proc Natl Acad Sci U S A* 104(13):5569-5574.
11. Ikenoue T, *et al.* (2005) Functional analysis of PIK3CA gene mutations in human colorectal cancer. *Cancer Res* 65(11):4562-4567.
12. Rudd ML, *et al.* (2011) Unique Spectrum of Somatic PIK3CA (p110 $\alpha$ ) Mutations Within Primary Endometrial Carcinomas. *Clinical Cancer Research* 17(6):1331-1340.
13. Riviere JB, *et al.* (2012) De novo germline and postzygotic mutations in AKT3, PIK3R2 and PIK3CA cause a spectrum of related megalencephaly syndromes. *Nature genetics* 44(8):934-940.
14. Loconte DC, *et al.* (2015) Molecular and Functional Characterization of Three Different Postzygotic Mutations in PIK3CA-Related Overgrowth Spectrum (PROS) Patients: Effects on PI3K/AKT/mTOR Signaling and Sensitivity to PIK3 Inhibitors. *PLoS ONE* 10(4).
15. Mirzaa G, *et al.* (2016) PIK3CA-associated developmental disorders exhibit distinct classes of mutations with variable expression and tissue distribution. *JCI Insight* 1(9).
16. Burke JE, Perisic O, Masson GR, Vadas O, & Williams RL (2012) Oncogenic mutations mimic and enhance dynamic events in the natural activation of phosphoinositide 3-kinase p110alpha (PIK3CA). *Proc Natl Acad Sci U S A* 109(38):15259-15264.
17. Shibata T, Kokubu A, Tsuta K, & Hirohashi S (2009) Oncogenic mutation of PIK3CA in small cell lung carcinoma: a potential therapeutic target pathway for chemotherapy-resistant lung cancer. *Cancer Lett* 283(2):203-211.

18. Lui VWY, *et al.* (2013) Frequent Mutation of the PI3K Pathway in Head and Neck Cancer Defines Predictive Biomarkers. *Cancer Discovery* 3(7):761-769.
19. Rios JJ, *et al.* (2013) Somatic gain-of-function mutations in PIK3CA in patients with macrodactyly. *Hum Mol Genet* 22(3):444-451.
20. Orloff MS, *et al.* (2013) Germline PIK3CA and AKT1 mutations in Cowden and Cowden-like syndromes. *Am J Hum Genet* 92(1):76-80.
21. Ross RL, Askham JM, & Knowles MA (2013) PIK3CA mutation spectrum in urothelial carcinoma reflects cell context-dependent signaling and phenotypic outputs. *Oncogene* 32(6):768-776.
22. Lucas CL, *et al.* (2014) Heterozygous splice mutation in PIK3R1 causes human immunodeficiency with lymphoproliferation due to dominant activation of PI3K. *J Exp Med* 211(13):2537-2547.

Table E1: Extensive clinical table for patients A.I.1, A.II.1, and B.1

|                                                     | A.I.1                                                               | A.II.1                                                                                             | B.1                                                                                        |
|-----------------------------------------------------|---------------------------------------------------------------------|----------------------------------------------------------------------------------------------------|--------------------------------------------------------------------------------------------|
| <b>Amino acid substitution</b>                      | G124D                                                               | G124D                                                                                              | E81K                                                                                       |
| <b>Presenting symptoms, age of onset</b>            | Severe pneumonia, 6 years                                           | CVID/ALPS-like, 0.5 years                                                                          | Recurrent skin abscesses and pneumonia, failure to thrive, 0.5 years                       |
| <b>Viral infections (excluding EBV)</b>             | Herpes labialis, warts, herpes zoster                               | Varicella after vaccine                                                                            | N.D.                                                                                       |
| <b>Other bacterial infections</b>                   | MRSA in BAL, Pseudomonas                                            | Otitis media (x20), bacteremia Strep pneumo, C. diff colitis, bursitis (staph aureus age 4 months) | Y                                                                                          |
| <b>Fungal infections</b>                            | Oral candidiasis                                                    | Oral candidiasis                                                                                   | N                                                                                          |
| <b>Splenomegaly</b>                                 | N                                                                   | Y                                                                                                  | N                                                                                          |
| <b>Pulmonary symptoms and imaging abnormalities</b> | Y lung resection, bronchiectasis                                    | N.D.                                                                                               | PET/CT several confluent peribronchial nodules                                             |
| <b>Asthma or other allergies</b>                    | Y                                                                   | Y                                                                                                  | Eczema, asthma -mild persistent                                                            |
| <b>GI symptoms</b>                                  | GERD                                                                | N.D.                                                                                               | Abdominal pain                                                                             |
| <b>Dermatological abnormalities</b>                 | Plantar warts                                                       | Eczema                                                                                             | Dermatitis                                                                                 |
| <b>Any other systemic symptoms or signs</b>         | Poor dentition                                                      | N.D.                                                                                               | Failure to thrive; height and weight <3 <sup>rd</sup> percentile                           |
| <b>History of malignancy</b>                        | N                                                                   | Abdominal mass                                                                                     | Non-Hodgkin lymphoma but without definitive dx; did not receive chemo or radiation therapy |
| <b>NK cells (CD3-CD56+CD16+)</b>                    | 74-168/ $\mu$ L ↓<br>(126-729/ $\mu$ L)<br>8.3-13.4%<br>(6.2-34.6%) | 451/ $\mu$ L<br>(90-900/ $\mu$ L)<br>13-17%<br>(4-31%)                                             | 70-117/ $\mu$ L ↓<br>(152-595/ $\mu$ L)<br>6-10% ↓<br>(7-28%)                              |
| <b>Memory B cells (CD27+)</b>                       | 12-21/ $\mu$ L<br>(12-68/ $\mu$ L)<br>0.8-2.8%<br>(0.8-3.6%)        | N.D.                                                                                               | 6-22/ $\mu$ L ↓<br>(19-131/ $\mu$ L)<br>0.6-1.6% ↓<br>(1-5%)                               |



|                                                                                                                                                                                                                                                                                                                                                                                                    |                                                                                                                         |                                                                          |                                                                                          |
|----------------------------------------------------------------------------------------------------------------------------------------------------------------------------------------------------------------------------------------------------------------------------------------------------------------------------------------------------------------------------------------------------|-------------------------------------------------------------------------------------------------------------------------|--------------------------------------------------------------------------|------------------------------------------------------------------------------------------|
| <b>Transitional B cells (CD38+IgM+ or CD10+IgM+)</b>                                                                                                                                                                                                                                                                                                                                               | 3-9/ $\mu$ L ↓<br>(9-120/ $\mu$ L)<br>0.3-0.7% ↓<br>(0.5-5.3%)                                                          | N.D.                                                                     | 160/ $\mu$ L ↑<br>(0-11/ $\mu$ L)<br>26.6% ↑<br>(0-4%)                                   |
| <b>IgG</b>                                                                                                                                                                                                                                                                                                                                                                                         | 462-649 mg/dL ↓<br>(633-1280 mg/dL)<br>pre-treatment                                                                    | 437-688 mg/dL ↓<br>(441-1280 mg/dL)                                      | 1680-2292 mg/dL ↑<br>(698-1549 mg/dL)                                                    |
| <b>IgA</b>                                                                                                                                                                                                                                                                                                                                                                                         | 27-37 mg/dL ↓<br>(33-202 mg/dL)<br>pre-treatment                                                                        | 7-23 mg/dL ↓<br>(22-202 mg/dL)                                           | N.D.                                                                                     |
| <b>IgM</b>                                                                                                                                                                                                                                                                                                                                                                                         | 157-565 mg/dL ↑<br>(48-207 mg/dL)                                                                                       | 87-413 mg/dL ↑<br>(47-207 mg/dL)                                         | N.D.                                                                                     |
| <b>Antibody responsiveness to vaccines</b>                                                                                                                                                                                                                                                                                                                                                         | N/A (on Hizentra)<br>Prior to treatment, nl<br>response to<br>pneumococcus,<br>diphtheria toxoid,<br>and tetanus toxoid | Poor response to<br>polysaccharides,<br>tetanus, mumps<br>non-detectable | nl                                                                                       |
| <b>Lymph node biopsy</b>                                                                                                                                                                                                                                                                                                                                                                           | Y                                                                                                                       | N                                                                        | Y, EBV lymphadenitis,<br>possible benign<br>marginal zone<br>hyperplasia, no<br>lymphoma |
| <b>Bone marrow biopsy</b>                                                                                                                                                                                                                                                                                                                                                                          | N.D.                                                                                                                    | N.D.                                                                     | Y, normocellular<br>w/trilineage<br>hematopoiesis                                        |
| <b>Lung biopsy or BAL</b>                                                                                                                                                                                                                                                                                                                                                                          | Y                                                                                                                       | N.D.                                                                     | N.D.                                                                                     |
| <b>Other surgeries</b>                                                                                                                                                                                                                                                                                                                                                                             | Lung resection, right<br>salpingo-<br>oophorectomy                                                                      | Splenectomy,<br>tonsillectomy                                            | Small bowel resection                                                                    |
| Abbreviations: ALPS, autoimmune lymphoproliferative syndrome; BAL, bronchoalveolar lavage; CVID, common variable immunodeficiency; dx, diagnosis; EBV, Epstein-Barr virus; GERD, gastroesophageal reflux disease; N, no; N/A, not applicable; N.D., not determined; nl, normal; Y, yes. Numerical data indicate ranges of patient values listed above age-matched reference ranges in parentheses. |                                                                                                                         |                                                                          |                                                                                          |

**Table E2: Reported p110 $\alpha$  variants in the ABD and ABD-RBD linker with associated disease phenotypes.**

| p110 $\alpha$ Site                                                                                                                                                                                                                                                                                                                                                                                                                                                        | Variant  | Cancer Association             | PROS Association     | Gain-of-Function | Corresponding p110 $\delta$ Site* |
|---------------------------------------------------------------------------------------------------------------------------------------------------------------------------------------------------------------------------------------------------------------------------------------------------------------------------------------------------------------------------------------------------------------------------------------------------------------------------|----------|--------------------------------|----------------------|------------------|-----------------------------------|
| Adaptor-binding domain (AA 16-105)                                                                                                                                                                                                                                                                                                                                                                                                                                        |          |                                |                      |                  |                                   |
| R38                                                                                                                                                                                                                                                                                                                                                                                                                                                                       | C        | CR(7)                          |                      | ✓(8, 9)**        | R38                               |
|                                                                                                                                                                                                                                                                                                                                                                                                                                                                           | H        | CR(7)                          |                      | ✓(10, 11)        |                                   |
| <b>E81</b>                                                                                                                                                                                                                                                                                                                                                                                                                                                                | <b>K</b> | <b>NEEC(12)</b>                | <b>MCAP(13)</b>      | <b>✓(14)</b>     | <b>E81</b>                        |
| R88                                                                                                                                                                                                                                                                                                                                                                                                                                                                       | Q        | CR(7),<br>EEC(12),<br>NEEC(12) | MCAP(13)             | ✓(8, 9, 12)      | R88                               |
| R93                                                                                                                                                                                                                                                                                                                                                                                                                                                                       | Q        | EEC(12)                        | MCAP(15),<br>OVG(15) | N.D.             | Q93                               |
|                                                                                                                                                                                                                                                                                                                                                                                                                                                                           | W        | EEC(12)                        |                      | ✓(12)            |                                   |
| P104                                                                                                                                                                                                                                                                                                                                                                                                                                                                      | L        |                                | MCAP(15)             | N.D.             | R104                              |
|                                                                                                                                                                                                                                                                                                                                                                                                                                                                           | R        | CR(7)                          |                      | N.D.             |                                   |
| ABD-RBD linker (AA 106-186)                                                                                                                                                                                                                                                                                                                                                                                                                                               |          |                                |                      |                  |                                   |
| G106                                                                                                                                                                                                                                                                                                                                                                                                                                                                      | R        | EEC(12)                        |                      | ✓(12)            | G106                              |
|                                                                                                                                                                                                                                                                                                                                                                                                                                                                           | V        | CR(7)                          | OVG(15)              | ✓(11, 12, 16)    |                                   |
| GNR106                                                                                                                                                                                                                                                                                                                                                                                                                                                                    | del      | SCLC(17)                       |                      | ✓(17)            | GDR106                            |
| R108                                                                                                                                                                                                                                                                                                                                                                                                                                                                      | H        | NEEC(12)                       |                      | ✓(9)             | R108                              |
|                                                                                                                                                                                                                                                                                                                                                                                                                                                                           | P        | CR(7)                          |                      | N.D.             |                                   |
| E109                                                                                                                                                                                                                                                                                                                                                                                                                                                                      | del      | EEC(12)                        |                      | N.D.             | V109                              |
| E110                                                                                                                                                                                                                                                                                                                                                                                                                                                                      | K        | HNSCC(18)                      |                      | N.D.             | K110                              |
| K111                                                                                                                                                                                                                                                                                                                                                                                                                                                                      | del      | CR(7)                          |                      | ✓(12)            | K111                              |
|                                                                                                                                                                                                                                                                                                                                                                                                                                                                           | E        | EEC(12),<br>NEEC(12)           |                      | ✓(12)            |                                   |
|                                                                                                                                                                                                                                                                                                                                                                                                                                                                           | N        | NEEC(12)                       |                      | ✓(10)            |                                   |
| R115                                                                                                                                                                                                                                                                                                                                                                                                                                                                      | P        |                                | MCAP(15),<br>MD(19)  | ✓(19)            | S115                              |
| G118                                                                                                                                                                                                                                                                                                                                                                                                                                                                      | D        | CR(7), EEC(12)                 | CS(20)               | ✓(16, 20)        | S118                              |
| G122                                                                                                                                                                                                                                                                                                                                                                                                                                                                      | D        | CR(7)                          |                      | N.D.**           | G122                              |
| <b>P124</b>                                                                                                                                                                                                                                                                                                                                                                                                                                                               | <b>L</b> | <b>UC(21)</b>                  |                      | <b>✓(21)</b>     | <b>G124</b>                       |
|                                                                                                                                                                                                                                                                                                                                                                                                                                                                           | <b>T</b> | <b>CR(7)</b>                   |                      | <b>N.D.</b>      |                                   |
| E135                                                                                                                                                                                                                                                                                                                                                                                                                                                                      | K        |                                | CS(20)               | N.D.             | E135                              |
| V136                                                                                                                                                                                                                                                                                                                                                                                                                                                                      | I        | UC(21)                         |                      | N.D.             | V136                              |
| Abbreviations: ABD, adaptor-binding domain; CR, colorectal cancers; CS, Cowden syndrome; EEC, endometrioid endometrial cancer; HNSCC, head and neck squamous cell carcinoma; MCAP, megalencephaly-capillary malformation syndrome; MD, macrodactyly; N.D., not determined; NEEC, non-endometrioid endometrial cancer; OVG, overgrowth; PROS, <i>PIK3CA</i> -related overgrowth spectrum; RBD, Ras-binding domain; SCLC, small cell lung cancer; UC, urothelial carcinoma. |          |                                |                      |                  |                                   |

\*Determined by NCBI Protein BLAST aligning human p110 $\alpha$  (P42336.2) with p110 $\delta$  (O00329.2). Conserved residues are displayed in italics; residues corresponding to mutations in patients A.I.1, A.II.1, or B.1 are in red.

\*\*ExAC browser reports one person each germline heterozygous for minor alleles R38C and G122S (frequency 0.0000083).

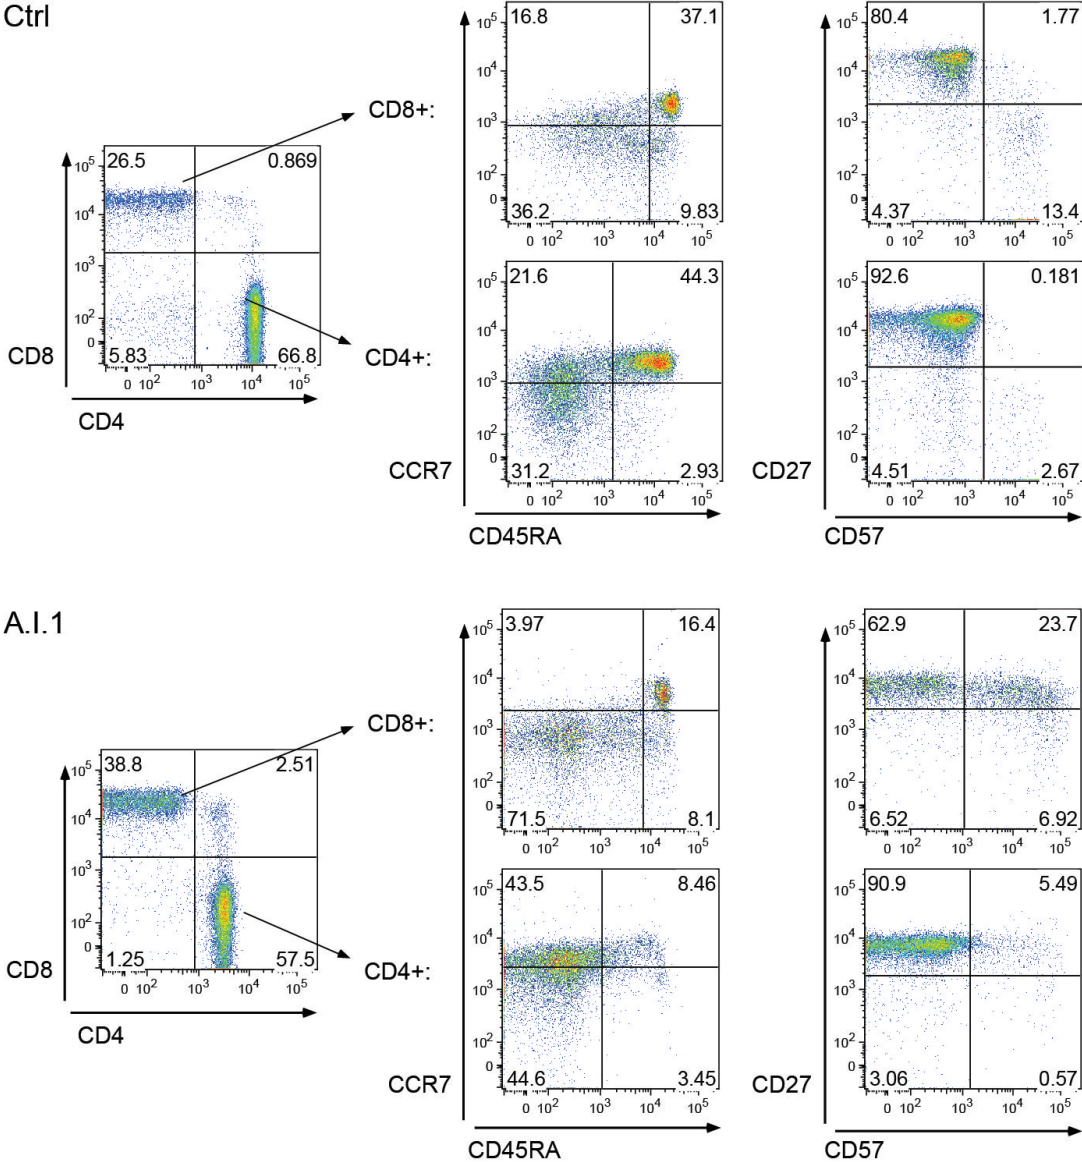

Figure E1

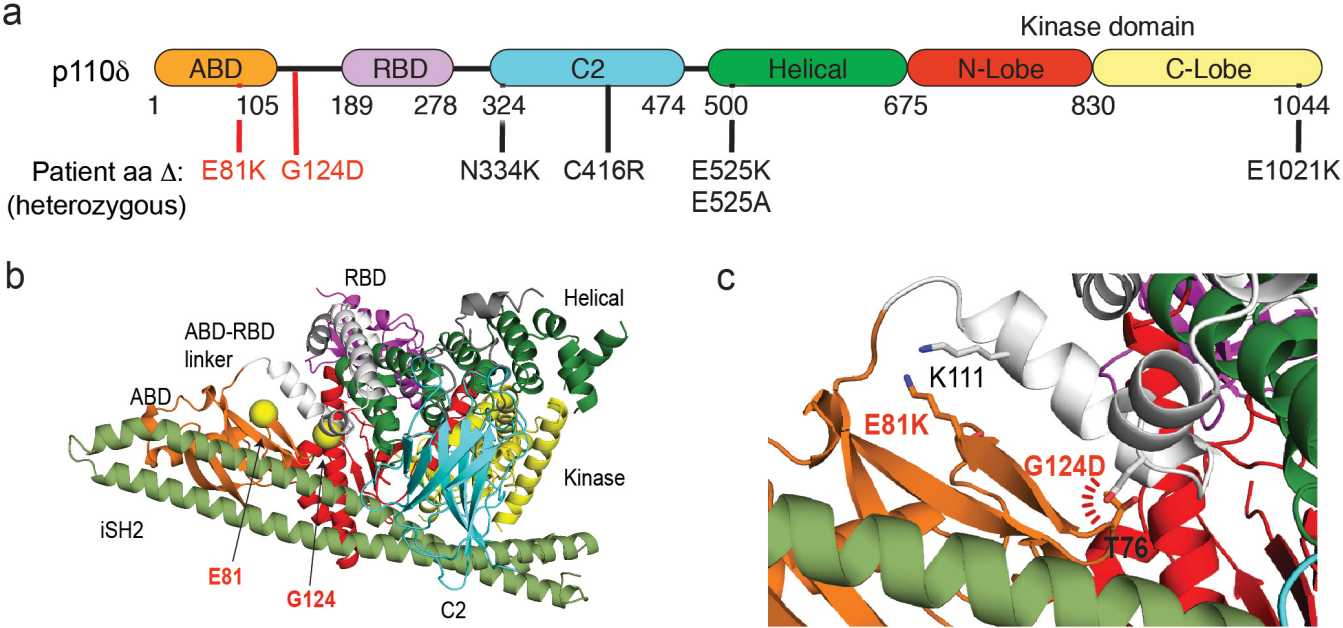

Figure E2

| p110δ |     |   |      | WT Basal |     |      |     |      |     | E81K Basal |     |      |     |      |     | G124D Basal |     |      |     |      |     |
|-------|-----|---|------|----------|-----|------|-----|------|-----|------------|-----|------|-----|------|-----|-------------|-----|------|-----|------|-----|
| S     | E   | Z | RT   | 3        | SD  | 30   | SD  | 300  | SD  | 3          | SD  | 30   | SD  | 300  | SD  | 3           | SD  | 30   | SD  | 300  | SD  |
| 12    | 18  | 2 | 4.1  | 65.0     | 0.9 | 66.6 | 0.6 | 66.9 | 0.4 | 66.6       | 0.7 | 66.3 | 0.9 | 66.9 | 0.9 | 66.6        | 0.8 | 66.9 | 1.4 | 66.6 | 0.6 |
| 12    | 19  | 2 | 4.1  | 64.9     | 0.9 | 66.1 | 0.3 | 66.3 | 1.3 | 67.4       | 0.6 | 65.8 | 0.2 | 67.6 | 0.7 | 66.4        | 0.8 | 66.8 | 0.9 | 66.6 | 0.6 |
| 24    | 31  | 2 | 12.4 | 3.4      | 0.3 | 13.7 | 0.3 | 22.6 | 0.3 | 3.3        | 0.1 | 14.1 | 0.1 | 26.0 | 0.6 | 4.2         | 0.2 | 16.6 | 0.1 | 24.6 | 0.1 |
| 32    | 42  | 2 | 9.5  | 23.6     | 0.2 | 32.9 | 0.5 | 34.0 | 0.2 | 24.6       | 0.9 | 32.4 | 0.4 | 34.0 | 0.7 | 22.8        | 0.6 | 32.5 | 0.5 | 33.7 | 0.1 |
| 35    | 42  | 2 | 5.2  | 34.3     | 1.1 | 47.3 | 0.8 | 48.8 | 0.6 | 35.9       | 1.2 | 46.9 | 1.2 | 50.3 | 0.6 | 33.9        | 0.9 | 47.7 | 0.7 | 49.4 | 0.1 |
| 43    | 59  | 4 | 11.6 | 5.4      | 0.2 | 11.3 | 0.1 | 18.8 | 0.3 | 5.5        | 0.4 | 11.4 | 0.2 | 19.8 | 0.4 | 5.1         | 0.1 | 12.0 | 0.1 | 21.7 | 0.3 |
| 43    | 67  | 4 | 12.1 | 15.3     | 0.3 | 24.8 | 0.3 | 32.1 | 0.3 | 15.7       | 0.7 | 24.6 | 0.1 | 31.9 | 0.4 | 15.0        | 0.1 | 24.7 | 0.5 | 32.8 | 0.3 |
| 48    | 59  | 3 | 11.8 | 8.7      | 0.4 | 17.8 | 0.3 | 28.9 | 0.3 | 8.7        | 0.5 | 17.9 | 0.3 | 28.2 | 0.5 | 8.3         | 0.2 | 18.7 | 0.3 | 30.5 | 0.3 |
| 60    | 67  | 2 | 6.2  | 38.5     | 0.7 | 54.0 | 0.6 | 63.0 | 0.6 | 40.2       | 1.1 | 54.8 | 0.6 | 63.6 | 0.6 | 39.4        | 0.5 | 54.2 | 0.5 | 63.1 | 0.4 |
| 71    | 82  | 1 | 8.1  | 17.6     | 0.6 | 28.6 | 0.2 | 39.5 | 0.5 | ##         | ##  | ##   | ##  | ##   | ##  | 16.7        | 0.4 | 30.8 | 0.4 | 51.0 | 1.1 |
| 71    | 82  | 2 | 8.1  | 17.7     | 0.6 | 27.9 | 0.5 | 38.7 | 0.2 | ##         | ##  | ##   | ##  | ##   | ##  | 16.7        | 0.3 | 30.2 | 0.5 | 49.8 | 0.3 |
| 71    | 96  | 3 | 12.5 | 22.2     | 0.5 | 36.7 | 0.1 | 49.8 | 0.3 | 25.0       | 0.6 | 37.3 | 0.4 | 53.3 | 0.7 | 20.5        | 0.1 | 38.1 | 0.4 | 57.6 | 0.3 |
| 83    | 96  | 3 | 11.1 | 9.9      | 0.2 | 23.7 | 0.2 | 40.0 | 0.5 | ##         | ##  | ##   | ##  | ##   | ##  | 9.6         | 0.3 | 25.8 | 0.6 | 45.4 | 0.9 |
| 102   | 116 | 4 | 6.1  | 54.2     | 0.5 | 59.5 | 0.4 | 59.6 | 1.2 | 58.2       | 0.6 | 58.7 | 0.1 | 59.9 | 0.9 | 55.6        | 1.0 | 60.0 | 0.5 | 59.4 | 0.7 |
| 102   | 120 | 3 | 10.3 | 36.0     | 1.0 | 40.6 | 0.4 | 44.9 | 0.3 | 41.9       | 0.8 | 46.9 | 0.8 | 53.7 | 1.6 | 37.4        | 1.2 | 42.1 | 0.7 | 48.9 | 0.7 |
| 120   | 127 | 3 | 5.6  | 12.5     | 1.0 | 29.5 | 0.8 | 45.4 | 1.9 | 16.6       | 1.0 | 37.3 | 1.9 | 47.2 | 0.3 | 12.8        | 0.3 | 27.6 | 0.7 | 41.4 | 0.9 |
| 121   | 127 | 2 | 4.2  | 12.6     | 0.8 | 31.3 | 0.2 | 47.9 | 1.0 | 17.2       | 1.3 | 41.2 | 0.8 | 48.5 | 0.9 | 13.8        | 0.1 | 29.7 | 0.8 | 41.5 | 0.3 |
| 121   | 131 | 3 | 9.6  | 14.0     | 0.3 | 27.5 | 0.5 | 30.1 | 0.3 | 18.6       | 0.6 | 28.4 | 0.4 | 29.7 | 0.2 | 11.2        | 0.4 | 26.3 | 0.3 | 29.4 | 0.7 |
| 132   | 138 | 1 | 4.8  | 7.1      | 1.0 | 15.7 | 0.9 | 40.8 | 1.6 | 7.6        | 1.2 | 18.3 | 0.7 | 44.3 | 1.0 | 6.1         | 0.8 | 17.8 | 0.2 | 43.4 | 1.6 |
| 132   | 139 | 1 | 9.3  | 4.8      | 0.3 | 11.4 | 0.2 | 30.6 | 0.8 | 5.4        | 0.6 | 13.2 | 0.3 | 31.6 | 1.0 | 4.5         | 0.7 | 13.1 | 0.7 | 31.2 | 0.4 |
| 139   | 145 | 2 | 7.3  | 4.4      | 0.1 | 17.7 | 0.2 | 38.4 | 0.7 | 4.9        | 0.3 | 18.5 | 1.1 | 40.4 | 0.5 | 4.1         | 0.1 | 19.3 | 0.4 | 41.3 | 0.4 |
| 150   | 162 | 3 | 11.1 | 18.4     | 0.4 | 37.2 | 0.2 | 59.7 | 0.2 | 18.0       | 0.5 | 38.1 | 0.5 | 59.7 | 0.4 | 17.1        | 0.2 | 38.2 | 0.5 | 59.9 | 0.2 |
| 163   | 190 | 3 | 12.9 | 47.7     | 0.0 | 58.7 | 0.1 | 65.3 | 0.1 | 47.3       | 0.5 | 57.8 | 0.3 | 64.4 | 0.3 | 46.9        | 0.5 | 57.8 | 0.4 | 64.9 | 0.1 |
| 168   | 191 | 3 | 12.2 | 55.2     | 0.3 | 65.4 | 0.2 | 70.3 | 0.1 | 54.5       | 0.6 | 64.2 | 0.7 | 69.1 | 0.3 | 54.0        | 0.7 | 64.5 | 0.4 | 69.6 | 0.2 |
| 183   | 191 | 3 | 9.3  | 53.5     | 0.8 | 73.1 | 0.5 | 80.8 | 0.4 | 52.7       | 0.3 | 73.2 | 0.5 | 79.8 | 0.6 | 52.2        | 0.7 | 74.1 | 0.6 | 79.1 | 1.0 |
| 192   | 200 | 1 | 6.9  | 29.7     | 0.5 | 38.3 | 0.4 | 45.2 | 0.9 | 29.8       | 0.4 | 38.2 | 0.8 | 46.5 | 1.0 | 29.4        | 0.3 | 38.5 | 0.9 | 46.3 | 0.5 |
| 203   | 216 | 3 | 12.4 | 16.8     | 0.4 | 30.7 | 0.1 | 34.3 | 0.4 | 16.5       | 0.7 | 30.4 | 0.2 | 34.1 | 0.9 | 15.6        | 0.2 | 30.6 | 0.2 | 34.0 | 0.2 |
| 205   | 216 | 2 | 11.5 | 11.7     | 0.1 | 28.2 | 0.1 | 32.2 | 0.3 | 11.4       | 0.8 | 28.1 | 0.6 | 32.4 | 0.9 | 10.0        | 0.2 | 28.1 | 0.7 | 32.8 | 0.4 |
| 206   | 216 | 2 | 9.4  | 15.0     | 0.6 | 34.0 | 0.2 | 39.1 | 0.2 | 14.6       | 0.8 | 33.6 | 0.2 | 39.3 | 0.7 | 13.3        | 0.2 | 33.9 | 0.4 | 39.2 | 0.3 |
| 221   | 238 | 4 | 7.0  | 48.6     | 0.4 | 57.0 | 0.1 | 62.5 | 0.5 | 49.1       | 0.6 | 56.8 | 0.7 | 62.6 | 0.5 | 47.9        | 0.5 | 57.4 | 0.2 | 62.3 | 0.3 |
| 222   | 238 | 4 | 6.8  | 52.6     | 0.3 | 60.7 | 0.6 | 66.0 | 0.4 | 52.6       | 0.7 | 60.0 | 0.5 | 65.8 | 0.5 | 51.6        | 0.2 | 61.1 | 0.1 | 65.7 | 0.2 |
| 239   | 250 | 3 | 9.0  | 4.6      | 0.1 | 5.0  | 0.1 | 7.3  | 0.2 | 5.1        | 0.3 | 5.0  | 0.2 | 7.4  | 0.4 | 4.5         | 0.1 | 5.0  | 0.1 | 7.3  | 0.0 |
| 251   | 258 | 1 | 9.5  | 11.1     | 0.3 | 12.0 | 0.5 | 12.3 | 0.1 | 11.7       | 0.3 | 11.3 | 0.6 | 12.0 | 0.8 | 11.9        | 1.6 | 11.5 | 0.4 | 11.8 | 0.4 |
| 251   | 259 | 2 | 12.8 | 5.8      | 0.1 | 8.0  | 0.1 | 8.3  | 0.2 | 6.0        | 0.5 | 8.7  | 0.7 | 8.2  | 0.6 | 5.5         | 0.5 | 5.6  | 0.2 | 5.9  | 0.0 |
| 265   | 274 | 3 | 7.8  | 13.5     | 0.3 | 17.4 | 0.2 | 22.7 | 0.3 | 14.1       | 0.4 | 17.2 | 0.5 | 23.0 | 0.5 | 13.8        | 0.2 | 17.6 | 0.1 | 22.7 | 0.1 |
| 267   | 283 | 4 | 9.2  | 4.1      | 0.1 | 4.9  | 0.1 | 7.3  | 0.4 | 4.5        | 0.2 | 4.8  | 0.2 | 7.7  | 0.7 | 4.1         | 0.1 | 4.9  | 0.0 | 7.4  | 0.2 |
| 284   | 313 | 5 | 4.8  | 65.7     | 0.7 | 67.6 | 0.2 | 69.2 | 0.4 | 66.6       | 0.7 | 67.2 | 0.7 | 69.2 | 0.4 | 66.3        | 0.6 | 67.7 | 0.4 | 68.9 | 0.3 |
| 284   | 316 | 5 | 6.1  | 60.8     | 0.6 | 62.3 | 0.4 | 63.3 | 0.5 | 61.3       | 0.5 | 61.8 | 0.5 | 63.1 | 0.3 | 61.2        | 0.7 | 62.3 | 0.5 | 62.8 | 0.3 |
| 317   | 327 | 2 | 13.8 | 10.2     | 0.1 | 15.7 | 0.1 | 21.9 | 0.1 | 10.0       | 0.3 | 15.2 | 0.3 | 22.0 | 0.3 | 9.8         | 0.1 | 15.7 | 0.2 | 21.9 | 0.1 |
| 328   | 337 | 2 | 4.2  | 19.0     | 0.9 | 35.7 | 0.2 | 44.8 | 0.6 | 19.6       | 1.2 | 36.7 | 0.7 | 45.7 | 0.4 | 17.4        | 0.2 | 38.5 | 0.2 | 45.2 | 0.1 |
| 328   | 341 | 4 | 6.8  | 14.0     | 0.0 | 22.8 | 0.2 | 29.8 | 0.4 | 14.4       | 0.4 | 23.2 | 0.4 | 30.6 | 0.7 | 13.7        | 0.2 | 24.4 | 0.1 | 29.6 | 0.6 |
| 342   | 353 | 2 | 9.7  | 8.2      | 0.2 | 13.8 | 0.2 | 16.6 | 0.4 | 8.1        | 0.7 | 13.1 | 0.2 | 18.3 | 0.2 | 7.8         | 0.2 | 13.3 | 0.0 | 16.5 | 0.3 |
| 355   | 362 | 2 | 3.4  | 30.6     | 0.8 | 46.0 | 0.5 | 49.4 | 0.3 | 30.1       | 1.5 | 46.2 | 0.8 | 49.7 | 0.4 | 29.0        | 0.3 | 46.6 | 0.5 | 48.9 | 0.6 |
| 366   | 377 | 3 | 11.2 | 15.5     | 0.2 | 23.1 | 0.1 | 34.9 | 0.3 | 15.1       | 0.4 | 22.9 | 0.1 | 35.0 | 0.1 | 14.8        | 0.3 | 23.4 | 0.3 | 36.8 | 0.2 |
| 378   | 384 | 2 | 12.5 | 11.0     | 0.3 | 12.1 | 0.0 | 3.1  | 0.2 | 11.1       | 0.4 | 12.2 | 0.2 | 3.1  | 0.2 | 11.1        | 0.1 | 15.1 | 0.0 | 3.2  | 0.2 |
| 395   | 423 | 5 | 8.4  | 12.3     | 0.2 | 15.1 | 0.3 | 18.1 | 0.3 | 12.7       | 0.2 | 14.5 | 0.3 | 18.0 | 0.5 | 11.8        | 0.3 | 14.9 | 0.3 | 15.8 | 0.3 |
| 426   | 439 | 4 | 9.1  | 16.9     | 0.1 | 25.1 | 0.5 | 31.3 | 0.5 | 16.8       | 0.4 | 24.5 | 0.5 | 31.7 | 0.5 | 15.9        | 0.3 | 24.8 | 0.3 | 31.6 | 0.2 |
| 439   | 452 | 2 | 12.4 | 33.4     | 0.1 | 36.2 | 0.2 | 40.4 | 0.4 | 32.9       | 0.3 | 35.4 | 0.3 | 39.6 | 0.7 | 32.6        | 0.3 | 34.7 | 0.4 | 39.5 | 0.3 |
| 440   | 452 | 2 | 11.6 | 38.6     | 0.1 | 41.8 | 0.2 | 46.8 | 0.2 | 40.4       | 0.4 | 44.6 | 0.4 | 50.7 | 2.9 | 37.9        | 0.5 | 40.1 | 0.4 | 46.3 | 0.1 |
| 440   | 468 | 3 | 10.9 | 31.4     | 0.3 | 42.2 | 0.1 | 52.1 | 0.6 | 31.1       | 0.6 | 41.9 | 0.4 | 51.6 | 0.7 | 29.8        | 0.4 | 40.6 | 0.3 | 51.4 | 0.2 |
| 453   | 468 | 2 | 5.9  | 41.3     | 0.8 | 57.3 | 0.2 | 70.7 | 0.1 | 41.3       | 1.0 | 57.9 | 0.3 | 74.3 | 0.3 | 39.4        | 0.3 | 56.8 | 0.2 | 70.5 | 0.7 |
| 473   | 485 | 2 | 10.4 | 26.3     | 0.4 | 36.8 | 1.4 | 51.9 | 0.7 | 25.8       | 1.0 | 35.1 | 0.5 | 51.8 | 1.3 | 25.1        | 1.2 | 36.6 | 0.4 | 53.9 | 1.3 |
| 476   | 485 | 2 | 8.5  | 23.3     | 0.7 | 35.3 | 0.1 | 56.9 | 0.8 | 22.9       | 0.8 | 34.9 | 0.2 | 57.3 | 0.9 | 21.7        | 0.2 | 35.3 | 0.4 | 57.7 | 0.2 |
| 476   | 488 | 2 | 10.5 | 29.1     | 0.6 | 41.4 | 0.1 | 58.7 | 0.2 | 28.7       | 0.6 | 41.1 | 0.1 | 58.7 | 0.4 | 27.9        | 0.2 | 41.1 | 0.3 | 58.8 | 0.1 |
| 501   | 508 | 2 | 4.3  | 36.0     | 0.8 | 46.7 | 1.0 | 65.2 | 0.3 | 34.8       | 0.7 | 47.7 | 1.2 | 66.1 | 0.4 | 34.2        | 0.3 | 48.4 | 0.4 | 65.7 | 0.4 |
| 515   | 522 | 2 | 4.2  | 53.7     | 1.5 | 54.8 | 0.4 | 54.6 | 1.0 | 54.7       | 0.8 | 53.5 | 1.5 | 55.3 | 0.9 | 55.0        | 0.7 | 54.8 | 0.8 | 54.2 | 0.2 |
| 516   | 523 | 1 | 11.6 | 53.7     | 1.5 | 54.5 | 0.3 | 54.6 | 1.0 | 54.0       | 0.5 | 53.7 | 1.7 | 55.5 | 0.7 | 55.2        | 0.5 | 54.9 | 0.8 | 54.5 | 0.4 |
| 524   | 546 | 5 | 11.4 | 23.5     | 0.1 | 8.3  | 0.1 | 7.7  | 0.3 | 2.5        | 0.3 | 6.2  | 0.0 | 6.0  | 0.5 | 2.2         | 0.1 | 8.2  | 0.2 | 7.7  | 0.2 |
| 550   | 564 | 4 | 8.4  | 11.1     | 0.1 | 4.0  | 0.1 | 5.6  | 0.1 | 1.2        | 0.1 | 3.7  | 0.1 | 5.7  | 0.3 | 1.0         | 0.1 | 4.0  | 0.0 | 5.5  | 0.1 |
| 568   | 574 | 2 | 13.2 | 11.1     | 0.4 | 27.1 | 0.3 | 45.7 | 1.1 | 10.0       | 0.9 | 26.2 | 0.8 | 45.5 | 1.1 | 9.9         | 0.5 | 26.6 | 0.1 | 46.5 | 0.5 |
| 568   | 577 | 2 | 14.2 | 22.4     | 1.1 | 40.9 | 1.3 | 56.9 | 0.3 | 21.3       | 1.0 | 40.2 | 0.8 | 57.1 | 1.3 | 20.3        | 0.3 | 41.1 | 0.8 | 57.4 | 1.1 |
| 583   | 587 | 1 | 13.0 | 17.3     | 0.3 | 34.3 | 0.8 | 51.1 | 0.3 | 16.5       | 1.0 | 33.6 | 1.1 | 50.3 | 0.5 | 16.1        | 0.8 | 36.2 | 0.3 | 51.3 | 0.3 |
| 583   | 595 | 2 | 12.3 | 3.2      | 0.2 | 14.2 | 0.3 | 35.5 | 0.4 | 8.3        | 0.5 | 12.7 | 0.2 | 35.7 | 0.4 | 7.4         | 0.2 | 17.0 | 0.0 | 35.2 | 0.2 |
| 585   | 595 | 2 | 12.3 | 5.0      | 0.2 | 12.2 | 0.2 | 27.5 | 0.3 | 5.0        | 0.6 | 11.1 | 0.8 | 28.9 | 0.4 | 4.1         | 0.1 | 10.0 | 0.1 | 25.1 | 0.0 |
| 596   | 608 | 2 | 8.4  | 8.0      | 0.0 | 13.0 | 0.5 | 19.4 | 0.2 | 8.4        | 0.4 | 13.0 | 0.1 | 19.5 | 0.9 | 8.1         | 0.5 | 12   |     |      |     |

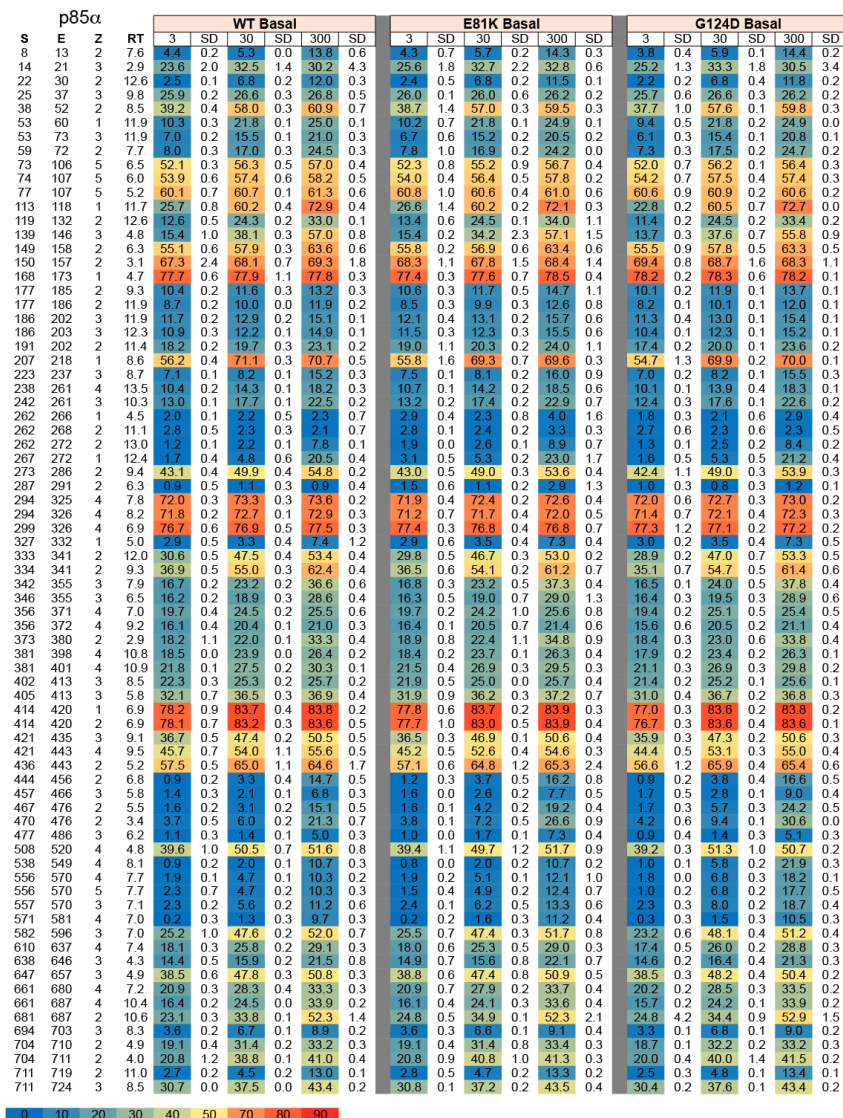



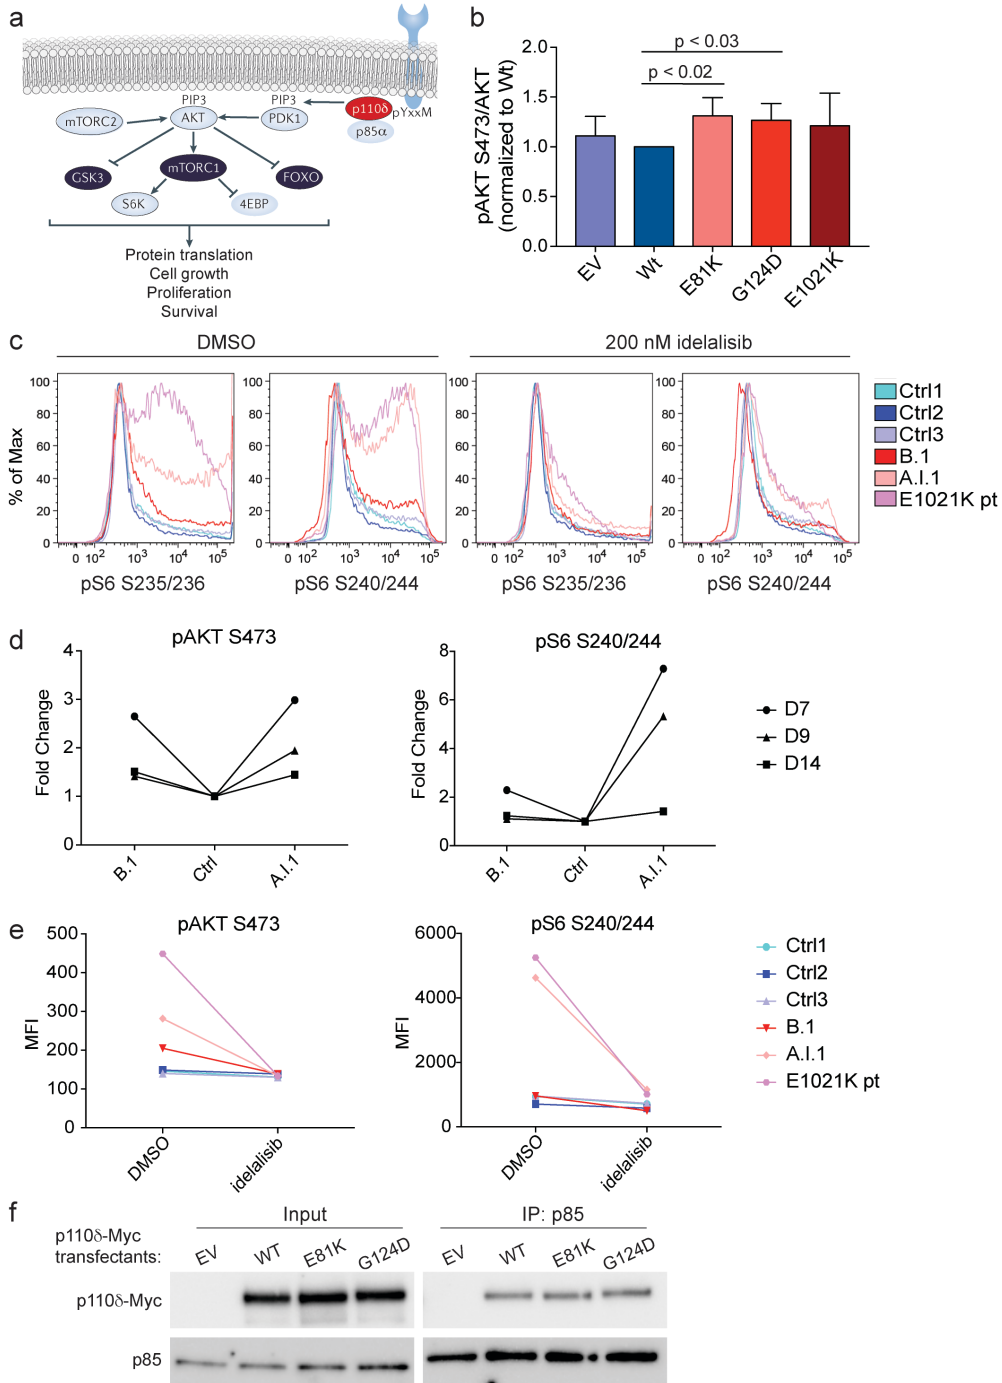

Figure E5
